# Supplementary material for: The structures and electronic states of zinc–water clusters Znn(H2O)m(n = 1–32 and m = 1–3)
Source: Royal Society of Chemistry journal article supplement (doi:10.1039/b706898k), 2007-01-01
Supplement: b706898k.pdf [file b706898k.pdf]

## ELECTRIC SUPPLEMENTARY INFORMATION (ESI)

The Structures and Electronic States of Zinc-Water Clusters  $Zn_n(H_2O)_m$  ( $n=1-32$  and  $m=1-3$ )

Hiroto TACHIKAWA,\* Kei IOKIBE, Kazuhisa AZUMI and Hiroshi KAWABATA#

*Division of Materials Chemistry, Graduate School of Engineering,  
Hokkaido University, Sapporo 060-8628, JAPAN*

*#Department of Electronic Science and Engineering, Kyoto University, Nishikyo-ku,  
Kyoto 615-8510, JAPAN*

---

Cartesian coordinates of large clusters are given below.

n=20

| Center<br>Number | Atomic<br>Number | Atomic<br>Type | Coordinates (Angstroms) |           |           |
|------------------|------------------|----------------|-------------------------|-----------|-----------|
|                  |                  |                | X                       | Y         | Z         |
| 1                | 30               | 0              | 4.936169                | -0.285854 | -0.840115 |
| 2                | 30               | 0              | 0.713867                | 3.422807  | -1.233551 |
| 3                | 30               | 0              | 2.356038                | -2.087050 | -1.923491 |
| 4                | 30               | 0              | -0.366605               | 1.064246  | -2.634872 |
| 5                | 30               | 0              | -2.145924               | 2.998993  | -1.316813 |
| 6                | 30               | 0              | -0.616944               | -1.962028 | -2.631451 |
| 7                | 30               | 0              | -2.858424               | -0.089936 | -1.802029 |
| 8                | 30               | 0              | 2.624848                | -1.083237 | 0.782913  |
| 9                | 30               | 0              | 2.369205                | 0.897925  | -1.508827 |
| 10               | 30               | 0              | -0.884806               | 3.568945  | 1.268007  |
| 11               | 30               | 0              | 0.137383                | -2.868392 | 0.054764  |
| 12               | 30               | 0              | -2.630592               | 1.146923  | 0.810551  |
| 13               | 30               | 0              | -2.766423               | -2.888755 | -0.817823 |
| 14               | 30               | 0              | 2.173311                | 0.228633  | 3.384647  |
| 15               | 30               | 0              | 1.594838                | 1.897200  | 1.068868  |
| 16               | 30               | 0              | 0.637221                | -2.227253 | 2.859334  |
| 17               | 30               | 0              | -0.165561               | -0.059033 | -0.069049 |
| 18               | 30               | 0              | -0.608211               | 0.948882  | 2.699411  |
| 19               | 30               | 0              | -2.043874               | -1.621456 | 1.717735  |
| 20               | 30               | 0              | -4.891776               | -0.902111 | 0.426856  |
| 21               | 8                | 0              | 7.196963                | -0.296464 | -0.884601 |
| 22               | 1                | 0              | 7.769436                | 0.324209  | -0.368969 |

23            1            0            7.742658    -0.935998    -1.406202

---

n=24

---

| Center<br>Number | Atomic<br>Number | Atomic<br>Type | Coordinates (Angstroms) |           |           |
|------------------|------------------|----------------|-------------------------|-----------|-----------|
|                  |                  |                | X                       | Y         | Z         |
| 1                | 30               | 0              | 0.167452                | 3.556803  | -1.143507 |
| 2                | 30               | 0              | 2.896158                | 1.953443  | -1.571050 |
| 3                | 30               | 0              | -1.706500               | 2.469010  | 0.799679  |
| 4                | 30               | 0              | 1.092438                | 1.518102  | 0.716639  |
| 5                | 30               | 0              | 4.468089                | -0.511365 | -1.169571 |
| 6                | 30               | 0              | -0.434586               | 2.068628  | 3.335867  |
| 7                | 30               | 0              | 2.039870                | 0.373011  | 3.193564  |
| 8                | 30               | 0              | -2.236033               | 2.172198  | -2.116986 |
| 9                | 30               | 0              | 1.275066                | -0.394957 | -1.492865 |
| 10               | 30               | 0              | 2.604471                | -2.821360 | -0.837218 |
| 11               | 30               | 0              | -1.153928               | -0.103764 | -0.102250 |
| 12               | 30               | 0              | 0.950445                | -1.489208 | 1.243571  |
| 13               | 30               | 0              | -0.720879               | -0.803230 | 3.684747  |
| 14               | 30               | 0              | -1.243115               | -0.436436 | -2.898355 |
| 15               | 30               | 0              | 0.266987                | -2.964780 | -2.792913 |
| 16               | 30               | 0              | -4.447024               | 1.480372  | -0.354664 |
| 17               | 30               | 0              | -2.551141               | -2.569688 | -1.428348 |
| 18               | 30               | 0              | -0.181722               | -3.925059 | -0.126794 |
| 19               | 30               | 0              | -4.607538               | -1.382917 | 0.201704  |
| 20               | 30               | 0              | -1.935744               | -2.248627 | 1.505248  |
| 21               | 30               | 0              | 0.496685                | 1.849433  | -3.397148 |
| 22               | 30               | 0              | -3.307405               | 0.377182  | 2.219036  |
| 23               | 30               | 0              | 3.917929                | -1.540434 | 1.613852  |
| 24               | 30               | 0              | 4.111833                | 1.453643  | 1.170412  |
| 25               | 8                | 0              | 0.678529                | 5.658113  | -0.780320 |
| 26               | 1                | 0              | 0.918410                | 5.972888  | 0.124066  |
| 27               | 1                | 0              | 0.799185                | 6.362242  | -1.461001 |

---

n=28

---

| Center<br>Number | Atomic<br>Number | Atomic<br>Type | Coordinates (Angstroms) |           |           |
|------------------|------------------|----------------|-------------------------|-----------|-----------|
|                  |                  |                | X                       | Y         | Z         |
| 1                | 30               | 0              | 1.070660                | -2.488996 | 2.557250  |
| 2                | 30               | 0              | -3.850143               | -1.980681 | 0.831897  |
| 3                | 30               | 0              | 3.188665                | -0.206241 | 2.327488  |
| 4                | 30               | 0              | 0.198004                | 0.193512  | 2.449631  |
| 5                | 30               | 0              | -2.819173               | 0.721478  | 2.316715  |
| 6                | 30               | 0              | -0.649300               | 2.924178  | 2.654753  |
| 7                | 30               | 0              | -2.948545               | 3.246036  | 0.891711  |
| 8                | 30               | 0              | 2.322766                | -3.532242 | -2.097899 |
| 9                | 30               | 0              | 0.700692                | -1.446997 | -0.140600 |
| 10               | 30               | 0              | -1.916983               | -2.424712 | -1.449426 |
| 11               | 30               | 0              | 0.798665                | 1.417886  | -0.148667 |

---

|    |    |   |           |           |           |
|----|----|---|-----------|-----------|-----------|
| 12 | 30 | 0 | -1.620526 | 0.085388  | -0.082136 |
| 13 | 30 | 0 | -0.160576 | 4.179780  | 0.145772  |
| 14 | 30 | 0 | 2.516993  | -0.379329 | -2.110379 |
| 15 | 30 | 0 | 0.207986  | -1.648818 | -3.191417 |
| 16 | 30 | 0 | 4.532728  | 0.349131  | -0.185886 |
| 17 | 30 | 0 | 0.384655  | 1.286031  | -3.061914 |
| 18 | 30 | 0 | -2.246135 | 0.042822  | -3.174231 |
| 19 | 30 | 0 | 3.049189  | 2.514320  | -1.987121 |
| 20 | 30 | 0 | -1.789579 | 2.504333  | -1.626227 |
| 21 | 30 | 0 | -0.931885 | -3.764588 | 0.840267  |
| 22 | 30 | 0 | 3.041045  | 2.621456  | 1.340978  |
| 23 | 30 | 0 | -4.630026 | 1.218889  | -0.204821 |
| 24 | 30 | 0 | -1.825134 | -1.921457 | 2.901539  |
| 25 | 30 | 0 | -4.584408 | -1.142358 | -1.912278 |
| 26 | 30 | 0 | 1.759226  | -4.867326 | 0.448876  |
| 27 | 30 | 0 | 2.551893  | 4.924254  | -0.492871 |
| 28 | 30 | 0 | 3.555418  | -2.553716 | 0.550981  |
| 29 | 1  | 0 | 1.068921  | 0.537135  | 5.295581  |
| 30 | 8  | 0 | 0.289315  | 0.350395  | 4.719337  |
| 31 | 1  | 0 | -0.568544 | 0.498733  | 5.190240  |

n=32

| Center<br>Number | Atomic<br>Number | Atomic<br>Type | Coordinates (Angstroms) |           |           |
|------------------|------------------|----------------|-------------------------|-----------|-----------|
|                  |                  |                | X                       | Y         | Z         |
| 1                | 30               | 0              | 1.164053                | 3.327729  | -0.467185 |
| 2                | 30               | 0              | 2.451509                | 0.440182  | 3.306405  |
| 3                | 30               | 0              | -1.739716               | 3.263912  | -1.620368 |
| 4                | 30               | 0              | -0.810237               | 1.611335  | 0.711463  |
| 5                | 30               | 0              | -0.475860               | 1.022474  | 3.487717  |
| 6                | 30               | 0              | -3.212746               | 1.199247  | 2.396544  |
| 7                | 30               | 0              | -2.095402               | -1.356300 | 3.271646  |
| 8                | 30               | 0              | 4.864703                | 0.301394  | -1.387038 |
| 9                | 30               | 0              | 1.397254                | 0.403777  | -0.738520 |
| 10               | 30               | 0              | 3.342604                | -0.971781 | 0.869377  |
| 11               | 30               | 0              | -1.296888               | -0.776510 | -0.699515 |
| 12               | 30               | 0              | 0.419405                | -0.886640 | 1.589894  |
| 13               | 30               | 0              | -3.643438               | -1.383879 | 0.796842  |
| 14               | 30               | 0              | 0.342789                | -0.836937 | -2.995359 |
| 15               | 30               | 0              | 2.732698                | -2.159319 | -1.887203 |
| 16               | 30               | 0              | -2.173533               | 0.699498  | -3.098628 |
| 17               | 30               | 0              | -0.026520               | -3.352896 | -1.646643 |
| 18               | 30               | 0              | 1.678769                | -3.455135 | 0.693605  |
| 19               | 30               | 0              | -2.233753               | -2.320019 | -3.401282 |
| 20               | 30               | 0              | -1.341164               | -3.095247 | 1.049511  |
| 21               | 30               | 0              | 3.370579                | 1.897569  | 0.695700  |
| 22               | 30               | 0              | -3.561828               | 1.173524  | -0.542589 |
| 23               | 30               | 0              | 0.270321                | -2.857284 | 4.018655  |
| 24               | 30               | 0              | 1.337960                | 3.004099  | 2.435901  |
| 25               | 30               | 0              | 3.163493                | -2.566604 | 3.293225  |
| 26               | 30               | 0              | 3.530025                | 2.847362  | -2.210512 |
| 27               | 30               | 0              | -4.581274               | -1.138624 | -2.083784 |

|    |    |   |           |           |           |
|----|----|---|-----------|-----------|-----------|
| 28 | 30 | 0 | 0.524627  | 2.078341  | -3.088392 |
| 29 | 30 | 0 | -3.701441 | 3.762688  | 0.849058  |
| 30 | 30 | 0 | -0.977875 | 4.564970  | 1.727517  |
| 31 | 30 | 0 | 2.976304  | 0.414985  | -3.598150 |
| 32 | 30 | 0 | -3.255154 | -3.697764 | -1.149911 |
| 33 | 1  | 0 | 4.991971  | -3.409302 | -0.839551 |
| 34 | 8  | 0 | 4.593966  | -3.410885 | -1.766100 |
| 35 | 1  | 0 | 5.048394  | -4.047997 | -2.371011 |

---
